# Supplementary material
Source: ML conference proceedings conference paper supplement (https://openaccess.thecvf.com/content/CVPR2022/html/Tang_An_Image_Patch_CVPR_2022_paper.html)
Supplement: Supplementary file 1 [file Tang_An_Image_Patch_CVPR_2022_supplemental.pdf]

# An Image Patch is a Wave: Phase-Aware Vision MLP (Supplementary Material)

Yehui Tang<sup>1,2</sup>, Kai Han<sup>2</sup>, Jianyuan Guo<sup>2,3</sup>, Chang Xu<sup>3</sup>,  
Yanxi Li<sup>2,3</sup>, Chao Xu<sup>1</sup>, Yunhe Wang<sup>2\*</sup>

<sup>1</sup>School of Artificial Intelligence, Peking University. <sup>2</sup>Huawei Noah’s Ark Lab.

<sup>3</sup>School of Computer Science, University of Sydney.

yhtang@pku.edu.cn, {kai.han, yunhe.wang}@huawei.com.

## 1. Detailed Architectures

Table 1 shows the detailed specifications of the proposed Wave-MLP architecture. To get hierarchical features, we split the whole model into four stages, and reduce the size of feature map stage-wisely. The Wave-MLP family contains four models with different parameters and computational costs by adjusting the depths and widths of architecture specifications, which are denoted as Wave-MLP-T, Wave-MLP-S, Wave-MLP-M, and Wave-MLP-B, sequentially. From Wave-MLP-T to Wave-MLP-B, the number of parameters varies from 17M to 63M, and FLOPs varies from 2.4G to 10.2G.

## 2. More Experiments

For the object detection and instance segmentation tasks on COCO [3], we further train Mask R-CNN models with  $3\times$  schedule and multi-scale training strategy [1]. The results of different backbone are shown in Table 2. Compared with other backbones, the proposed Wave-MLP achieves much higher performance. For example, our Wave-MLP-T achieves 44.1 box AP and 40.1 mask AP with 25.3M parameters and 196.3G FLOPs, which is significantly superior to the PVT-Tiny model with 39.8 box AP, 37.4 mask AP, 32.9M parameters and 208.1G FLOPs.

## References

- [1] Kaiming He, Georgia Gkioxari, Piotr Dollár, and Ross Girshick. Mask r-cnn. In *Proceedings of the IEEE international conference on computer vision*, pages 2961–2969, 2017. 1, 2
- [2] Kaiming He, Xiangyu Zhang, Shaoqing Ren, and Jian Sun. Deep residual learning for image recognition. In *Proceedings of the IEEE conference on computer vision and pattern recognition*, pages 770–778, 2016. 2
- [3] Tsung-Yi Lin, Michael Maire, Serge Belongie, James Hays, Pietro Perona, Deva Ramanan, Piotr Dollár, and C Lawrence

Zitnick. Microsoft coco: Common objects in context. In *European conference on computer vision*, pages 740–755. Springer, 2014. 1

- [4] Wenhai Wang, Enze Xie, Xiang Li, Deng-Ping Fan, Kaitao Song, Ding Liang, Tong Lu, Ping Luo, and Ling Shao. Pyramid vision transformer: A versatile backbone for dense prediction without convolutions. In *IEEE ICCV*, 2021. 2

---

\*Corresponding author.

Table 1. Detailed architecture specifications of Wave-MLP. ‘Dimension’ and ‘expansion’ denote the dimension of feature and expand ratio, respectively. H and W are the height and width of input image. FLOPs is calculated with input size of 224×224.

|              | Output size                        | Wave-MLP-T                           | Wave-MLP-S                            | Wave-MLP-M                            | Wave-MLP-B                            |
|--------------|------------------------------------|--------------------------------------|---------------------------------------|---------------------------------------|---------------------------------------|
| stage 1      | $\frac{H}{4} \times \frac{W}{4}$   | dimension = 64<br>expansion = 4 × 2  | dimension = 64<br>expansion = 4 × 2   | dimension = 64<br>expansion = 8 × 3   | dimension = 96<br>expansion = 4 × 2   |
| stage 2      | $\frac{H}{8} \times \frac{W}{8}$   | dimension = 128<br>expansion = 4 × 2 | dimension = 128<br>expansion = 4 × 3  | dimension = 128<br>expansion = 8 × 4  | dimension = 192<br>expansion = 4 × 2  |
| stage 3      | $\frac{H}{16} \times \frac{W}{16}$ | dimension = 320<br>expansion = 4 × 4 | dimension = 320<br>expansion = 4 × 10 | dimension = 320<br>expansion = 4 × 18 | dimension = 384<br>expansion = 4 × 18 |
| stage 4      | $\frac{H}{32} \times \frac{W}{32}$ | dimension = 512<br>expansion = 4 × 2 | dimension = 512<br>expansion = 4 × 3  | dimension = 512<br>expansion = 4 × 3  | dimension = 768<br>expansion = 4 × 2  |
| # Parameters |                                    | 17M                                  | 30M                                   | 44M                                   | 63M                                   |
| FLOPs        |                                    | 2.4G                                 | 4.5G                                  | 7.9G                                  | 10.2G                                 |

Table 2. Results of object detection and instance segmentation on COCO val2017. The Mask R-CNN model trained with 3× schedule and multi-scale training strategy [1] is used as the detector.

| Backbone      | Params. / FLOPs | AP <sup>b</sup> | AP <sup>b</sup> <sub>50</sub> | AP <sup>b</sup> <sub>75</sub> | AP <sup>b</sup> <sub>S</sub> | AP <sup>b</sup> <sub>M</sub> | AP <sup>b</sup> <sub>L</sub> | AP <sup>m</sup> | AP <sup>m</sup> <sub>50</sub> | AP <sup>m</sup> <sub>75</sub> | AP <sup>m</sup> <sub>S</sub> | AP <sup>m</sup> <sub>M</sub> | AP <sup>m</sup> <sub>L</sub> |
|---------------|-----------------|-----------------|-------------------------------|-------------------------------|------------------------------|------------------------------|------------------------------|-----------------|-------------------------------|-------------------------------|------------------------------|------------------------------|------------------------------|
| ResNet18 [2]  | 31.2M / 207.3G  | 36.9            | 57.1                          | 40.0                          | -                            | -                            | -                            | 33.6            | 53.9                          | 35.7                          | -                            | -                            | -                            |
| PVT-Tiny [4]  | 32.9M / 208.1G  | 39.8            | 62.2                          | 43.0                          | -                            | -                            | -                            | 37.4            | 59.3                          | 39.9                          | -                            | -                            | -                            |
| Wave-MLP-T    | 25.3M / 196.3G  | <b>44.1</b>     | 66.0                          | 48.2                          | 28.4                         | 47.6                         | 55.9                         | <b>40.1</b>     | 63.1                          | 43.2                          | 24.3                         | 43.5                         | 53.2                         |
| ResNet50 [2]  | 44.2M / 260.1G  | 41.0            | 61.7                          | 44.9                          | -                            | -                            | -                            | 37.1            | 58.4                          | 40.1                          | -                            | -                            | -                            |
| PVT-Small [4] | 44.1M / 245.1G  | 43.0            | 65.3                          | 46.9                          | -                            | -                            | -                            | 39.9            | 62.5                          | 42.8                          | -                            | -                            | -                            |
| Wave-MLP-S    | 37.1M / 231.3G  | <b>45.5</b>     | 66.9                          | 49.3                          | 29.4                         | 48.7                         | 58.7                         | <b>41.0</b>     | 64.2                          | 44.0                          | 25.0                         | 44.2                         | 54.7                         |
| ResNet101 [2] | 63.2M / 336.4G  | 42.8            | 63.2                          | -                             | -                            | -                            | 47.1                         | 38.5            | 60.1                          | 41.3                          | -                            | -                            | -                            |
| PVT-Medium    | 63.9M / 301.7G  | 44.2            | 66.0                          | 48.2                          | -                            | -                            | -                            | 40.5            | 63.1                          | 43.5                          | -                            | -                            | -                            |
| PVT-Large     | 71.1M / 345.7G  | 44.5            | 66.0                          | 48.3                          | -                            | -                            | -                            | 40.7            | 63.4                          | 43.7                          | -                            | -                            | -                            |
| Wave-MLP-M    | 49.4M / 291.3G  | <b>46.3</b>     | 67.8                          | 50.3                          | 29.5                         | 49.3                         | 60.3                         | <b>41.5</b>     | 65.2                          | 44.1                          | 24.9                         | 44.7                         | 55.6                         |
